# Supplementary material for: Manipulation and prediction of spike morphology traits for the improvement of grain yield in wheat
Source: PubMed Central journal article supplement (PMC6158183; doi:10.1038/s41598-018-31977-3), 2018-09-26
Supplement: 41598_2018_31977_MOESM1_ESM.pdf [file 41598_2018_31977_MOESM1_ESM.pdf]

# **Manipulation and prediction of spike morphology traits for improvement of grain yield in wheat**

Zifeng Guo<sup>1</sup>, Yusheng Zhao<sup>2</sup>, Marion S. Röder<sup>3</sup>, Jochen C. Reif<sup>2</sup>, Martin W. Ganal<sup>4</sup>, Dijun Chen<sup>5</sup>, Thorsten Schnurbusch<sup>1\*</sup>

1 Independent HEISENBERG Research Group Plant Architecture, Leibniz Institute of Plant Genetics and Crop Plant Research, 06466 Gatersleben, Germany

2 Research Group Quantitative Genetics, Department of Breeding Research, Leibniz Institute of Plant Genetics and Crop Plant Research, 06466 Gatersleben, Germany

3 Research Group Gene and Genome Mapping, Department of Breeding Research, Leibniz Institute of Plant Genetics and Crop Plant Research, 06466 Gatersleben, Germany

4 TraitGenetics GmbH, 06466 Gatersleben, Germany

5 Research Group Image Analysis, Leibniz Institute of Plant Genetics and Crop Plant Research, 06466 Gatersleben, Germany

\* To whom correspondence should be addressed: E-mail: [thor@ipk-gatersleben.de](mailto:thor@ipk-gatersleben.de), 00490394825341

**Table S1.** The released years of the 12 wheat cultivars for detillering experiments.

| <b>Running number</b> | <b>cultivar name</b>   | <b>Year of release</b> |
|-----------------------|------------------------|------------------------|
| 1                     | Adlungs Alemannen      | 1931                   |
| 2                     | NOS Nordgau            | 1933                   |
| 3                     | Peragis Garant         | 1946                   |
| 4                     | Heines Peko            | 1947                   |
| 5                     | Hohenheimer Franken II | 1951                   |
| 6                     | Probat                 | 1953                   |
| 7                     | Breustedts Lera        | 1959                   |
| 8                     | Arin                   | 1962                   |
| 9                     | Kolibri                | 1966                   |
| 10                    | Ralle                  | 1980                   |
| 11                    | Nandu                  | 1988                   |
| 12                    | Fasan                  | 1997                   |

**Table S2.** Spikelet number per spike, spike length (cm), and spikelet density in 12 cultivars under control and tiller removal treatments in the greenhouse at harvest.

| Cultivar                  | Total spikelet number /spike |             | Spike length |             | Spikelet density |             |
|---------------------------|------------------------------|-------------|--------------|-------------|------------------|-------------|
|                           | Control                      | Detillering | Control      | Detillering | Control          | Detillering |
| 1- Adlung's Alemannen     | 20.50±2.43a                  | 20.67±1.03a | 11.88±0.50a  | 12.82±1.72a | 1.73±0.21a       | 1.64±0.29a  |
| 2- NOS Nordgau            | 23.33±1.21a                  | 22.00±1.22a | 11.60±0.66b  | 13.48±0.88a | 2.01±0.08a       | 1.64±0.13b  |
| 3- Peragis Garant         | 20.17±1.60a                  | 21.00±2.10a | 10.97±0.40a  | 12.50±1.74a | 1.84±0.17a       | 1.70±0.23a  |
| 4- Heine's Peko           | 24.83±1.33a                  | 24.33±2.25a | 10.62±1.08a  | 11.48±0.84a | 2.35±0.17a       | 2.12±0.20a  |
| 5- Hohenheimer Franken II | 20.50±0.84a                  | 20.67±0.82a | 10.94±0.43b  | 12.76±0.46a | 1.85±0.08a       | 1.60±0.04b  |
| 6- Probat                 | 28.33±1.51a                  | 27.25±3.59a | 12.17±0.70a  | 12.98±1.45a | 2.33±0.11a       | 2.11±0.26a  |
| 7- Breustedt's Lera       | 26.83±0.98a                  | 25.60±2.30a | 11.13±0.78a  | 12.76±1.33a | 2.42±0.17a       | 2.08±0.30a  |
| 8- Arin                   | 22.83±0.75a                  | 22.00±1.41a | 10.48±0.41b  | 12.45±0.31a | 2.18±0.12a       | 1.77±0.08b  |
| 9- Kolibri                | 23.00±0.89a                  | 22.50±1.05a | 10.77±0.95b  | 12.57±0.70a | 2.15±0.22a       | 1.79±0.08b  |
| 10- Ralle                 | 22.80±1.30a                  | 23.67±1.03a | 11.36±0.46b  | 12.47±0.65a | 2.01±0.12a       | 1.90±0.15a  |
| 11- Nandu                 | 23.17±1.72a                  | 24.33±1.86a | 11.32±0.92b  | 13.40±0.39a | 2.06±0.23a       | 1.82±0.13a  |
| 12- Fasan                 | 25.33±1.97a                  | 27.00±0.63a | 10.13±0.77b  | 12.77±0.96a | 2.50±0.14a       | 2.13±0.18b  |
| Average                   | 23.48±2.79a                  | 23.29±2.69a | 11.11±0.87b  | 12.68±1.09a | 2.13±0.28a       | 1.86±0.25b  |

Data are presented as the mean±SD, n=6. Different letters per trait indicate significant differences between control and treated plants ( $p=0.05$ ).

**Table S3.** Spikelet number per spike, spike length (cm), and spikelet density in 12 cultivars under control and tiller removal treatments in the field at harvest.

| Cultivar                     | Spikelet number /spike |             | Spike length |             | Spikelet density |             |
|------------------------------|------------------------|-------------|--------------|-------------|------------------|-------------|
|                              | Control                | Detillering | Control      | Detillering | Control          | Detillering |
| 1- Adlung's Alemannen        | 19.67±1.21a            | 19.00±0.89a | 11.05±0.62b  | 13.68±0.99a | 1.78±0.11a       | 1.39±0.09b  |
| 2- NOS Nordgau               | 22.50±2.07a            | 21.33±1.75a | 11.33±1.05b  | 12.70±1.00a | 1.99±0.21a       | 1.69±0.16b  |
| 3- Peragis Garant            | 20.00±1.10a            | 19.33±1.51a | 12.12±1.45b  | 13.22±0.74a | 1.66±0.15a       | 1.46±0.08b  |
| 4- Heine's Peko              | 23.17±1.47a            | 24.05±1.76a | 12.05±1.22b  | 14.05±1.07a | 1.93±0.18a       | 1.75±0.11b  |
| 5- Hohenheimer<br>Franken II | 18.67±0.82a            | 19.00±1.41a | 10.82±1.16b  | 13.02±0.96a | 1.74±0.15a       | 1.46±0.07b  |
| 6- Probat                    | 25.00±0.89a            | 21.67±2.52a | 12.52±1.40a  | 12.33±1.17a | 2.02±0.20a       | 1.66±0.15b  |
| 7- Breustedt's Lera          | 23.50±1.76a            | 23.00±0.00a | 12.05±1.49a  | 12.20±1.44a | 1.96±0.17a       | 1.90±0.22a  |
| 8- Arin                      | 21.67±2.42a            | 22.50±1.00a | 11.92±1.17b  | 13.48±0.31a | 1.82±0.08a       | 1.67±0.10b  |
| 9- Kolibri                   | 20.67±1.03a            | 21.17±1.72a | 10.73±1.12b  | 12.18±1.25a | 1.94±0.21a       | 1.74±0.13b  |
| 10- Ralle                    | 21.17±1.83a            | 22.20±0.84a | 11.18±1.78b  | 12.74±0.34a | 1.92±0.23a       | 1.74±0.05b  |
| 11- Nandu                    | 23.00±1.26a            | 23.40±0.55a | 11.10±0.76b  | 14.12±1.11a | 2.08±0.20a       | 1.66±0.12b  |
| 12- Fasan                    | 23.83±0.98a            | 24.17±1.60a | 11.51±1.02b  | 12.47±1.49a | 2.08±0.14a       | 1.95±0.17a  |
| Average                      | 21.90±2.30a            | 21.66±2.34a | 11.53±1.26b  | 13.07±1.15a | 1.91±0.21a       | 1.67±0.20b  |

Data are presented as the mean±SD, n=6; Different letters per trait indicate significant differences between control and treated plants ( $p=0.05$ ).

**Table S4.** Grain number per spike, spike chaff per spike (g), and spike fertility index in 12 cultivars under control and tiller removal treatments in the field at harvest.

| Cultivar                     | Grain number /spike |              | Spike chaff/spike |             | Spike fertility index |              |
|------------------------------|---------------------|--------------|-------------------|-------------|-----------------------|--------------|
|                              | Control             | Detillering  | Control           | Detillering | Control               | Detillering  |
| 1- Adlung's Alemannen        | 51.17±1.83b         | 61.5±6.72a   | 0.66±0.14b        | 1.73±0.10a  | 80.41±16.36a          | 52.59±5.80b  |
| 2- NOS Nordgau               | 61.00±13.28b        | 77.17±20.25a | 0.55±0.09b        | 0.87±0.16a  | 110.02±9.55a          | 90.92±25.86b |
| 3- Peragis Garant            | 48.00±18.21b        | 49.00±7.07a  | 0.67±0.15b        | 0.85±0.18a  | 69.78±13.90a          | 59.19±10.90b |
| 4- Heine's Peko              | 47.33±7.81b         | 60.50±10.45a | 0.86±0.17b        | 1.06±0.19a  | 57.83±21.26a          | 57.55±7.06a  |
| 5- Hohenheimer<br>Franken II | 38.33±3.33a         | 38.50±7.87a  | 0.69±0.12b        | 0.98±0.08a  | 57.25±11.63a          | 39.59±8.10b  |
| 6- Probat                    | 75.17±9.20a         | --           | 0.74±0.11a        | --          | 102.25±11.33a         | --           |
| 7- Breustedt's Lera          | 75.40±14.72a        | 54.33±17.67b | 0.70±0.07a        | 0.66±0.10a  | 107.29±17.65a         | 82.84±28.53b |
| 8- Arin                      | 82.17±10.20a        | 65.25±18.57b | 0.83±0.23a        | 0.86±0.16a  | 103.92±20.56a         | 76.17±12.37b |
| 9- Kolibri                   | 50.67±9.09b         | 62.00±11.01a | 0.71±0.12a        | 0.86±0.17a  | 72.55±14.73a          | 73.66±13.05a |
| 10- Ralle                    | 47.33±7.94a         | --           | 0.66±0.14a        | --          | 70.32±11.83a          | --           |
| 11- Nandu                    | 59.33±12.11a        | --           | 0.68±0.12a        | --          | 57.25±11.62a          | --           |
| 12- Fasan                    | 77.00±10.41a        | 49.00±10.00b | 0.82±0.11a        | 0.85±0.05a  | 93.66±6.15a           | 57.23±9.24b  |
| Average                      | 59.18±17.21a        | 57.35±15.84a | 0.72±0.15b        | 1.02±0.36a  | 84.25±22.60a          | 60.48±20.95b |

Data are presented as the mean±SD, n=6; different letters per trait indicate significant differences between control and treated plants ( $p=0.05$ ). The dashed line in the table indicates the missing data.

**Table S5.** Total spikelet number, fertile spikelet number, and spikelet fertility (%) in 12 cultivars under control and tiller removal treatments in the greenhouse at harvest.

| Cultivar                  | Total spikelet number/spike |             | Fertile spikelet number/spike |             | Spikelet fertility (%) |              |
|---------------------------|-----------------------------|-------------|-------------------------------|-------------|------------------------|--------------|
|                           | Control                     | Detillering | Control                       | Detillering | Control                | Detillering  |
| 1- Adlung's Alemannen     | 20.50±2.43a                 | 20.67±1.03a | 20.33±2.42a                   | 13.00±2.28b | 99.21±1.94a            | 62.65±8.27b  |
| 2- NOS Nordgau            | 23.33±1.21a                 | 22.00±1.22a | 20.33±1.63a                   | 15.60±2.51b | 87.12±4.74a            | 70.69±8.07b  |
| 3- Peragis Garant         | 20.17±1.60a                 | 21.00±2.10a | 17.00±1.41a                   | 14.67±5.54b | 84.89±11.32a           | 69.24±22.60a |
| 4- Heine's Peko           | 24.83±1.33a                 | 24.33±2.25a | 15.83±2.23a                   | 12.00±3.22a | 63.80±8.89a            | 48.83±9.77b  |
| 5- Hohenheimer Franken II | 20.50±0.84a                 | 20.67±0.82a | 16.00±3.24a                   | 10.25±0.96b | 77.91±16.77a           | 49.35±3.11b  |
| 6- Probat                 | 28.33±1.51a                 | 27.25±3.59a | 18.50±2.51a                   | 13.75±3.50b | 65.73±11.74a           | 50.97±12.93a |
| 7- Breustedt's Lera       | 26.83±0.98a                 | 25.60±2.30a | 16.83±3.60a                   | 12.60±2.87b | 62.44±11.44a           | 48.69±12.67a |
| 8- Arin                   | 22.83±0.75a                 | 22.00±1.41a | 15.33±1.21b                   | 19.00±2.61a | 67.17±5.11b            | 86.21±8.94a  |
| 9- Kolibri                | 23.00±0.89a                 | 22.50±1.05a | 20.33±2.34a                   | 20.50±2.26a | 88.39±9.39a            | 90.93±6.66a  |
| 10- Ralle                 | 22.80±1.30a                 | 23.67±1.03a | 21.00±1.58a                   | 20.83±2.56a | 92.11±4.69a            | 88.04±9.96a  |
| 11- Nandu                 | 23.16±1.72a                 | 24.33±1.86a | 19.33±3.14a                   | 20.83±3.76a | 83.71±13.98a           | 85.92±15.70a |
| 12- Fasan                 | 25.33±1.97a                 | 27.00±0.63a | 18.17±3.54a                   | 19.83±0.75a | 71.66±12.43a           | 73.49±3.29a  |
| Average                   | 23.48±2.79a                 | 23.29±2.69a | 18.24±3.02a                   | 16.54±4.57b | 78.50±15.16a           | 70.81±18.52b |

Data are presented as the mean±SD, n=6; different letters per trait indicate significant differences between control and treated plants ( $p=0.05$ ).

**Table S6.** Total spikelet number, fertile spikelet number, and spikelet fertility (%) in 12 cultivars under control and tiller removal treatments in the field at harvest.

| Cultivar                     | Total spikelet number/spike |             | Fertile spikelet number/spike |             | Spikelet fertility (%) |              |
|------------------------------|-----------------------------|-------------|-------------------------------|-------------|------------------------|--------------|
|                              | Control                     | Detillering | Control                       | Detillering | Control                | Detillering  |
| 1- Adlung's Alemannen        | 19.67±1.21a                 | 19.00±0.89a | 18.83±1.47a                   | 15.33±2.50b | 95.78±4.95a            | 80.73±12.63b |
| 2- NOS Nordgau               | 22.50±2.07a                 | 21.33±1.75a | 20.83±1.72a                   | 20.50±2.07a | 92.80±5.57a            | 96.01±3.73a  |
| 3- Peragis Garant            | 20.00±1.10a                 | 19.33±1.51a | 19.00±1.10a                   | 18.67±2.25a | 95.03±3.17a            | 96.39±6.70a  |
| 4- Heine's Peko              | 23.17±1.47a                 | 24.50±1.76a | 22.33±1.86a                   | 21.50±1.22a | 96.41±5.61a            | 88.25±9.57b  |
| 5- Hohenheimer<br>Franken II | 18.67±0.82a                 | 18.60±1.14a | 16.83±2.64a                   | 13.40±2.70b | 90.15±13.47a           | 71.68±11.50b |
| 6- Probat                    | 25.00±0.89a                 | 21.67±2.52a | 24.33±1.21a                   | 18.00±1.00b | 97.33±3.27a            | 83.49±5.35b  |
| 7- Breustedt's Lera          | 23.20±1.79a                 | 23.00±0.00a | 21.80±1.30a                   | 19.33±2.08b | 94.13±4.52a            | 84.06±9.05b  |
| 8- Arin                      | 21.67±2.42a                 | 22.50±1.00a | 21.50±2.74a                   | 21.50±0.58a | 99.07±2.27a            | 95.74±5.90a  |
| 9- Kolibri                   | 20.67±1.03a                 | 21.17±1.72a | 19.83±1.60a                   | 20.50±1.38a | 95.95±5.83a            | 97.07±5.28a  |
| 10- Ralle                    | 21.17±1.83a                 | 22.20±0.84a | 19.67±2.42a                   | 17.40±3.51b | 92.73±5.31a            | 78.03±13.26b |
| 11- Nandu                    | 23.00±1.26a                 | 23.40±0.55a | 21.17±1.17a                   | 22.60±0.55a | 92.19±5.96a            | 96.63±3.50a  |
| 12- Fasan                    | 23.83±0.98a                 | 23.25±0.96a | 23.33±1.63a                   | 20.40±3.65b | 97.83±3.64a            | 83.81±14.32b |
| Average                      | 21.86±2.28a                 | 21.53±2.25a | 20.77±2.63a                   | 19.10±3.33b | 94.96±6.05a            | 88.19±11.85b |

Data are presented as the mean±SD, n=6; different letters per trait indicate significant differences between control and treated plants ( $p=0.05$ ).

**Table S7.** Infertile spikelet number per spike and grain number per spikelet in apical, central, and basal spikelets in 12 cultivars under control and tiller removal treatments in the greenhouse at harvest.

| Cultivar                  | Infertile spikelet |             | Grain number/spikelet |             |                  |             |                |             |
|---------------------------|--------------------|-------------|-----------------------|-------------|------------------|-------------|----------------|-------------|
|                           | number/spike       |             | Apical spikelet       |             | Central spikelet |             | Basal spikelet |             |
|                           | Control            | Detillering | Control               | Detillering | Control          | Detillering | Control        | Detillering |
| 1- Adlung's Alemannen     | 0.17±0.41b         | 7.67±1.51a  | 2.50±0.55a            | 0.16±0.41b  | 3.67±0.52a       | 4.33±0.82a  | 3.67±0.52b     | 4.67±0.52a  |
| 2- NOS Nordgau            | 3.00±1.10b         | 6.40±1.67a  | 2.16±0.41a            | 0.40±0.89b  | 3.00±0.00a       | 3.60±0.55a  | 3.17±0.41b     | 3.80±0.84a  |
| 3- Peragis Garant         | 3.17±2.48b         | 6.33±4.63a  | 1.83±0.75a            | 1.83±1.60a  | 2.83±0.75a       | 2.83±1.72a  | 3.17±0.75a     | 3.50±0.84a  |
| 4- Heine's Peko           | 9.00±2.28b         | 12.33±1.97a | 0.16±0.41a            | 0.00±0.00b  | 2.83±0.41a       | 1.50±1.64b  | 3.17±0.75b     | 3.83±0.41a  |
| 5- Hohenheimer Franken II | 4.60±3.58b         | 10.50±0.58a | 1.00±1.10a            | 0.00±0.00a  | 2.00±0.63a       | 1.17±1.33b  | 2.83±0.41b     | 3.33±1.21a  |
| 6- Probat                 | 9.83±3.71b         | 13.50±4.73a | 0.17±0.41a            | 0.00±0.00b  | 3.17±0.41a       | 2.00±1.63b  | 3.17±0.41a     | 3.25±0.50a  |
| 7- Breustedt's Lera       | 10.00±2.75b        | 13.00±3.59a | 0.50±0.55a            | 0.00±0.00b  | 2.33±1.21a       | 2.40±2.07a  | 2.67±0.52b     | 3.20±1.79a  |
| 8- Arin                   | 7.50±1.22a         | 3.00±1.90b  | 0.83±0.75b            | 2.17±0.75a  | 3.33±0.52b       | 4.50±0.55a  | 3.00±0.63b     | 4.00±1.10a  |
| 9- Kolibri                | 2.67±2.16a         | 2.00±1.41a  | 1.83±0.41b            | 2.83±0.41a  | 3.00±0.00b       | 4.17±0.41a  | 2.33±0.82b     | 4.33±0.52a  |
| 10- Ralle                 | 1.80±1.10b         | 2.83±2.40a  | 1.80±0.45a            | 1.50±0.84b  | 2.40±0.55b       | 3.50±0.55a  | 2.60±0.55b     | 3.50±0.55a  |
| 11- Nandu                 | 3.83±3.37a         | 3.50±3.94a  | 1.83±0.41a            | 1.83±0.98a  | 3.00±0.00b       | 4.50±0.55a  | 2.50±0.84b     | 4.17±0.98a  |
| 12- Fasan                 | 7.17±3.13a         | 7.17±0.98a  | 1.50±0.84a            | 1.67±0.75a  | 2.83±0.41b       | 3.83±0.98a  | 2.67±1.37b     | 3.50±0.55a  |
| Average                   | 5.29±3.97b         | 6.86±4.55a  | 1.34±0.96a            | 1.04±1.20a  | 2.91±0.58a       | 3.78±0.94a  | 2.96±0.67b     | 3.85±0.85a  |

Data are presented as the mean±SD, n=6; different letters per trait indicate significant differences between control and treated plants ( $p=0.05$ ).



**Table S8.** Infertile spikelet number per spike and grain number per spikelet at apical, central, and basal spikelets in 12 cultivars under control and tiller removal treatments in the field at harvest.

| Cultivar                  | Infertile spikelet |             | Grain number/spikelet |             |                  |             |                |             |
|---------------------------|--------------------|-------------|-----------------------|-------------|------------------|-------------|----------------|-------------|
|                           | number/spike       |             | Apical spikelet       |             | Central spikelet |             | Basal spikelet |             |
|                           | Control            | Detillering | Control               | Detillering | Control          | Detillering | Control        | Detillering |
| 1- Adlung's Alemannen     | 0.83±0.98b         | 3.67±2.42a  | 2.50±0.55a            | 2.33±1.75a  | 3.67±0.82b       | 4.67±0.52a  | 3.50±0.55b     | 4.33±1.21a  |
| 2- NOS Nordgau            | 1.67±1.37a         | 0.83±0.75b  | 2.83±0.75a            | 3.00±1.55a  | 3.67±0.82b       | 4.50±0.84a  | 3.67±0.52b     | 4.50±0.84a  |
| 3- Peragis Garant         | 0.83±1.33b         | 0.67±1.21a  | 1.83±0.41a            | 2.50±1.05a  | 2.67±0.52b       | 3.33±1.03a  | 2.67±0.52b     | 3.33±1.03a  |
| 4- Heine's Peko           | 0.83±1.33b         | 3.00±2.45a  | 1.83±0.41a            | 2.00±0.63a  | 2.67±0.52b       | 3.50±0.84a  | 2.67±0.52b     | 3.33±1.03a  |
| 5- Hohenheimer Franken II | 1.83±2.48b         | 5.20±1.92a  | 2.33±0.52a            | 0.50±0.548b | 2.50±0.55b       | 3.33±0.52a  | 3.00±0.63b     | 3.50±0.55a  |
| 6- Probat                 | 0.67±0.82b         | 3.67±1.53a  | 2.50±0.55a            | 2.25±0.97a  | 3.83±0.75a       | 4.00±1.15a  | 3.33±1.03a     | 3.50±1.29a  |
| 7- Breustedt's Lera       | 1.40±1.14b         | 3.67±2.08a  | 2.33±1.37a            | 2.00±1.73a  | 3.83±1.47b       | 4.33±0.58a  | 4.50±0.55a     | 3.33±1.53b  |
| 8- Arin                   | 0.17±0.41b         | 1.00±1.41a  | 3.50±1.05a            | 3.50±1.00a  | 4.17±0.75a       | 3.75±1.26b  | 4.50±0.84a     | 3.75±0.96b  |
| 9- Kolibri                | 0.83±1.17a         | 0.67±1.21a  | 2.33±0.52b            | 2.83±0.41a  | 3.17±0.75b       | 4.17±1.17a  | 3.33±1.03a     | 3.50±1.52a  |
| 10- Ralle                 | 1.50±1.05b         | 4.80±2.77a  | 2.17±0.41a            | 1.50±1.64b  | 3.17±0.41a       | 3.33±0.82a  | 2.83±0.75b     | 4.00±0.89a  |
| 11- Nandu                 | 1.83±1.47a         | 0.80±0.84b  | 2.50±0.55b            | 3.00±0.00a  | 3.67±0.52b       | 4.17±0.75a  | 3.33±1.03a     | 3.17±0.98a  |
| 12- Fasan                 | 0.50±0.84b         | 3.00±3.31a  | 2.83±0.41a            | 1.83±1.33b  | 3.83±1.17a       | 3.00±0.63b  | 4.17±1.47a     | 3.17±0.98b  |
| Average                   | 1.08±1.26b         | 2.46±2.44a  | 2.53±0.75a            | 2.25±1.31ba | 3.47±0.90b       | 3.82±0.95a  | 3.49±1.02a     | 3.63±1.07a  |

Data are presented as the mean±SD, n=6; different letters per trait indicate significant differences between control and treated plants ( $p=0.05$ ).

..

**Table S9.** Heritabilities of the 44 traits in the 210 winter wheat cultivars.

| number | traits                       | attribution of traits | h <sup>2</sup> |
|--------|------------------------------|-----------------------|----------------|
| 1      | Grain A                      | main shoot            | 0.46           |
| 2      | Grain C                      | main shoot            | 0.49           |
| 3      | Grain B                      | main shoot            | 0.37           |
| 4      | grain number for tillers     | tiller                | 0.66           |
| 5      | grain weight for tillers (g) | tiller                | 0.72           |
| 6      | TKW (g)                      | tiller                | 0.77           |
| 7      | seed area (mm <sup>2</sup> ) | tiller                | 0.91           |
| 8      | seed width (mm)              | tiller                | 0.88           |
| 9      | seed length (mm)             | tiller                | 0.92           |
| 10     | tiller number                | tiller                | 0.72           |
| 11     | tiller DW (g)                | tiller                | 0.72           |
| 12     | stem length (cm)             | main shoot            | 0.88           |
| 13     | leaf number                  | main shoot            | 0.24           |
| 14     | leaf DW (g)                  | main shoot            | 0.65           |
| 15     | main DW (g)                  | main shoot            | 0.71           |
| 16     | spike length (cm)            | main shoot            | 0.81           |
| 17     | total spikelet number        | main shoot            | 0.82           |
| 18     | fertile spikelet number      | main shoot            | 0.56           |
| 19     | spike DW (g)                 | main shoot            | 0.72           |
| 20     | main stem DW (g)             | main shoot            | 0.73           |
| 21     | grain number/spike           | main shoot            | 0.69           |
| 22     | grain weight/spike           | main shoot            | 0.70           |
| 23     | spike chaff (g)              | main shoot            | 0.94           |
| 24     | TKW (g)                      | main shoot            | 0.71           |
| 25     | seed area (mm <sup>2</sup> ) | main shoot            | 0.92           |
| 26     | seed width (mm)              | main shoot            | 0.90           |
| 27     | seed length (mm)             | main shoot            | 0.93           |
| 28     | spikelet density             | main shoot            | 0.80           |
| 29     | spike fertility index        | main shoot            | 0.16           |
| 30     | grain weight/spike chaff     | main shoot            | 0.17           |
| 31     | spikelet fertility           | main shoot            | 0.52           |
| 32     | spike DW/main stem DW        | main shoot            | 0.70           |
| 33     | plant DW (g)                 | whole plant           | 0.76           |
| 34     | grain number                 | whole plant           | 0.73           |
| 35     | grain weight (g)             | whole plant           | 0.79           |
| 36     | TKW(g)                       | whole plant           | 0.83           |
| 37     | seed area (mm <sup>2</sup> ) | whole plant           | 0.93           |
| 38     | seed width (mm)              | whole plant           | 0.92           |
| 39     | seed length (mm)             | whole plant           | 0.94           |
| 40     | harvest index                | whole plant           | 0.77           |
| 41     | tiller DW/ main DW           | tiller/main           | 0.41           |
| 42     | Max.Floret A                 | main shoot            | 0.36           |
| 43     | Max.Floret C                 | main shoot            | 0.42           |
| 44     | Max.Floret B                 | main shoot            | 0.50           |

**Table S10.** Correlations values between TKW in the field and the 44 traits (spike morphology and assimilate partitioning traits) in the greenhouse based on the 210 winter wheat cultivars.

| number | traits                       | attribution of traits | correlations values with TKW |
|--------|------------------------------|-----------------------|------------------------------|
| 1      | Grain A                      | main shoot            | -0.075                       |
| 2      | Grain C                      | main shoot            | -0.201                       |
| 3      | Grain B                      | main shoot            | -0.087                       |
| 4      | grain number for tillers     | tiller                | -0.136                       |
| 5      | grain weight for tillers (g) | tiller                | 0.203                        |
| 6      | TKW (g)                      | tiller                | 0.521                        |
| 7      | seed area (mm <sup>2</sup> ) | tiller                | 0.570                        |
| 8      | seed width (mm)              | tiller                | 0.514                        |
| 9      | seed length (mm)             | tiller                | 0.534                        |
| 10     | tiller number                | tiller                | -0.109                       |
| 11     | tiller DW (g)                | tiller                | -0.005                       |
| 12     | stem length (cm)             | main shoot            | 0.055                        |
| 13     | leaf number                  | main shoot            | -0.136                       |
| 14     | leaf DW (g)                  | main shoot            | -0.152                       |
| 15     | main DW (g)                  | main shoot            | -0.011                       |
| 16     | spike length (cm)            | main shoot            | -0.168                       |
| 17     | total spikelet number        | main shoot            | -0.234                       |
| 18     | fertile spikelet number      | main shoot            | -0.326                       |
| 19     | spike DW (g)                 | main shoot            | 0.023                        |
| 20     | main stem DW (g)             | main shoot            | -0.052                       |
| 21     | grain number/spike           | main shoot            | -0.333                       |
| 22     | grain weight/spike           | main shoot            | 0.058                        |
| 23     | spike chaff (g)              | main shoot            | -0.089                       |
| 24     | TKW (g)                      | main shoot            | 0.586                        |
| 25     | seed area (mm <sup>2</sup> ) | main shoot            | 0.590                        |
| 26     | seed width (mm)              | main shoot            | 0.573                        |
| 27     | seed length (mm)             | main shoot            | 0.529                        |
| 28     | spikelet density             | main shoot            | -0.095                       |
| 29     | spike fertility index        | main shoot            | -0.260                       |
| 30     | grain weight/spike chaff     | main shoot            | 0.308                        |
| 31     | spikelet fertility           | main shoot            | -0.111                       |
| 32     | spike DW/main stem DW        | main shoot            | 0.188                        |
| 33     | plant DW (g)                 | whole plant           | -0.013                       |
| 34     | grain number                 | whole plant           | -0.241                       |
| 35     | grain weight (g)             | whole plant           | 0.158                        |
| 36     | TKW(g)                       | whole plant           | 0.587                        |
| 37     | seed area (mm <sup>2</sup> ) | whole plant           | 0.597                        |
| 38     | seed width (mm)              | whole plant           | 0.590                        |
| 39     | seed length (mm)             | whole plant           | 0.521                        |
| 40     | harvest index                | whole plant           | 0.235                        |
| 41     | tiller DW/ main DW           | tiller/main           | 0.044                        |
| 42     | Max.Floret A                 | main shoot            | -0.098                       |
| 43     | Max.Floret C                 | main shoot            | -0.265                       |
| 44     | Max.Floret B                 | main shoot            | -0.209                       |

**Table S11.** Correlations values between grain yield (ton per hectare) in the field and the 44 traits (spike morphology and assimilate partitioning traits) in the greenhouse based on the 210 winter wheat cultivars.

| number | traits                       | attribution of traits | correlations values with grain yield |
|--------|------------------------------|-----------------------|--------------------------------------|
| 1      | Grain A                      | main shoot            | -0.117                               |
| 2      | Grain C                      | main shoot            | -0.022                               |
| 3      | Grain B                      | main shoot            | -0.005                               |
| 4      | grain number for tillers     | tiller                | 0.241                                |
| 5      | grain weight for tillers (g) | tiller                | 0.192                                |
| 6      | TKW (g)                      | tiller                | -0.077                               |
| 7      | seed area (mm <sup>2</sup> ) | tiller                | -0.032                               |
| 8      | seed width (mm)              | tiller                | -0.152                               |
| 9      | seed length (mm)             | tiller                | 0.078                                |
| 10     | tiller number                | tiller                | 0.186                                |
| 11     | tiller DW (g)                | tiller                | 0.232                                |
| 12     | stem length (cm)             | main shoot            | -0.069                               |
| 13     | leaf number                  | main shoot            | -0.156                               |
| 14     | leaf DW (g)                  | main shoot            | -0.179                               |
| 15     | main DW (g)                  | main shoot            | -0.091                               |
| 16     | spike length (cm)            | main shoot            | -0.027                               |
| 17     | total spikelet number        | main shoot            | 0.014                                |
| 18     | fertile spikelet number      | main shoot            | 0.013                                |
| 19     | spike DW (g)                 | main shoot            | 0.035                                |
| 20     | main stem DW (g)             | main shoot            | -0.183                               |
| 21     | grain number/spike           | main shoot            | 0.044                                |
| 22     | grain weight/spike           | main shoot            | 0.086                                |
| 23     | spike chaff (g)              | main shoot            | -0.121                               |
| 24     | TKW (g)                      | main shoot            | 0.107                                |
| 25     | seed area (mm <sup>2</sup> ) | main shoot            | 0.095                                |
| 26     | seed width (mm)              | main shoot            | 0.053                                |
| 27     | seed length (mm)             | main shoot            | 0.122                                |
| 28     | spikelet density             | main shoot            | 0.040                                |
| 29     | spike fertility index        | main shoot            | 0.106                                |
| 30     | grain weight/spike chaff     | main shoot            | 0.062                                |
| 31     | spikelet fertility           | main shoot            | -0.112                               |
| 32     | spike DW/main stem DW        | main shoot            | 0.183                                |
| 33     | plant DW (g)                 | whole plant           | 0.092                                |
| 34     | grain number                 | whole plant           | 0.138                                |
| 35     | grain weight (g)             | whole plant           | 0.088                                |
| 36     | TKW(g)                       | whole plant           | -0.042                               |
| 37     | seed area (mm <sup>2</sup> ) | whole plant           | 0.009                                |
| 38     | seed width (mm)              | whole plant           | -0.063                               |
| 39     | seed length (mm)             | whole plant           | 0.095                                |
| 40     | harvest index                | whole plant           | 0.027                                |
| 41     | tiller DW/ main DW           | tiller/main           | 0.282                                |
| 42     | Max.Floret A                 | main shoot            | 0.079                                |
| 43     | Max.Floret C                 | main shoot            | -0.028                               |
| 44     | Max.Floret B                 | main shoot            | 0.043                                |

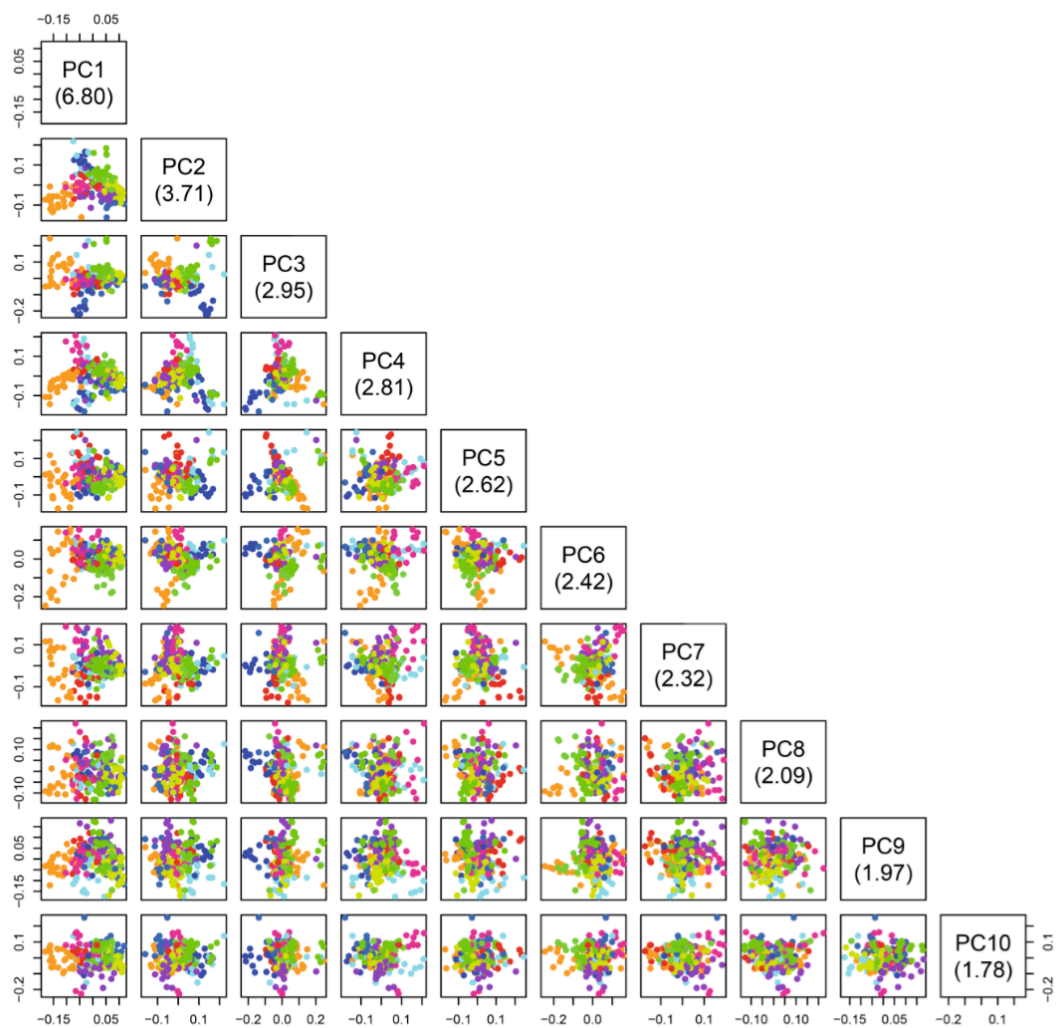

**Figure S1.** Genetic population structure determined by principal component analysis with SNP markers based on the 210 wheat cultivars.

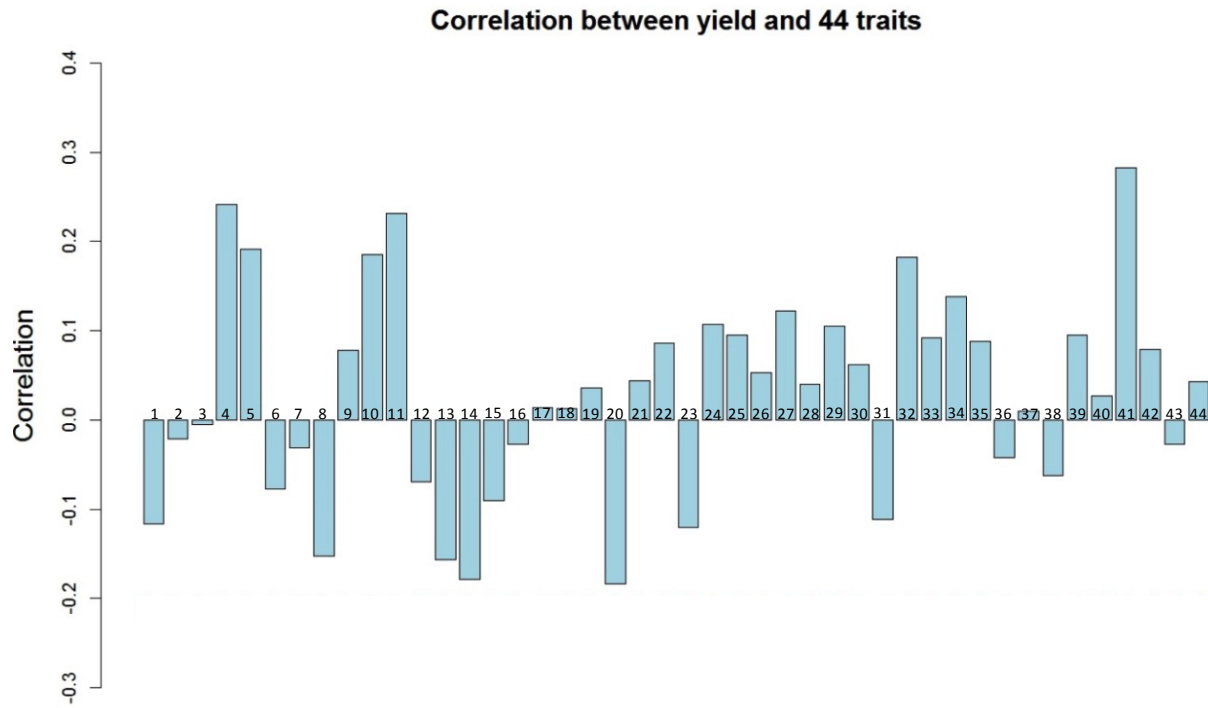

**Figure S2.** Correlations between grain yield in field and the 44 traits (spike morphology and assimilate partitioning traits) in greenhouse based on the 210 wheat cultivars.
